# Supplementary material for: Highly sensitive detection of rutin in pharmaceuticals and human serum using ITO electrodes modified with vertically-ordered mesoporous silica–graphene nanocomposite films
Source: Royal Society of Chemistry journal article supplement (doi:10.1039/d0tb01996h), 2020-01-01
Supplement: d0tb01996h1.pdf [file d0tb01996h1.pdf]

Supporting Information to

## **Highly sensitive detection of rutin in pharmaceuticals and human serum using ITO electrodes modified with vertically-ordered mesoporous silica-graphene nanocomposite films**

Xinyu Ma,<sup>‡,a</sup> Wenyan Liao,<sup>‡,b</sup> Huaxu Zhou,<sup>a</sup> Yun Tong,<sup>a</sup> Fei Yan,<sup>a,\*</sup> Hongliang Tang,<sup>c,\*</sup> and

Jiyang Liu<sup>a,\*</sup>

<sup>a</sup> Department of Chemistry, Zhejiang Sci-Tech University, 928 Second Avenue, Xiasha Higher Education Zone, Hangzhou, 310058, PR China

<sup>b</sup> Affiliated International Zhuang Medicine Hospital, Guangxi University of Chinese Medicine, Nanning, 530023, PR China

<sup>c</sup> The First Affiliated Hospital of Guangxi University of Chinese Medicine, Nanning, 530023, PR China.

\* Corresponding author. E-mail: feifei19881203@126.com; tanghongliang@gxctmu.edu.cn; liujy@zstu.edu.cn

‡ These two authors contributed equally.

### **Table of Contents**

#### **S1. XPS characterizations of GO/ITO and ErGO/ITO**

#### **S2. EIS characterizations of VMSF/ErGO/ITO**

#### **S3. CVs of rutin at the VMSF/ITO and VMSF/ErGO/ITO**

#### **S4. The effect of scan rate on the CV responses**

#### **S5. Transmittance spectra of bare ITO and VMSF/ErGO/ITO**

#### **S6. Optimized conditions for electrochemical detection**

S6.1 The concentration of GO

S6.2 pH of supporting electrolyte

S6.3 Preconcentration time

#### **S7. Anti-interference study of the VMSF/ErGO/ITO**

## S1 XPS characterization of GO/ITO and ErGO/ITO

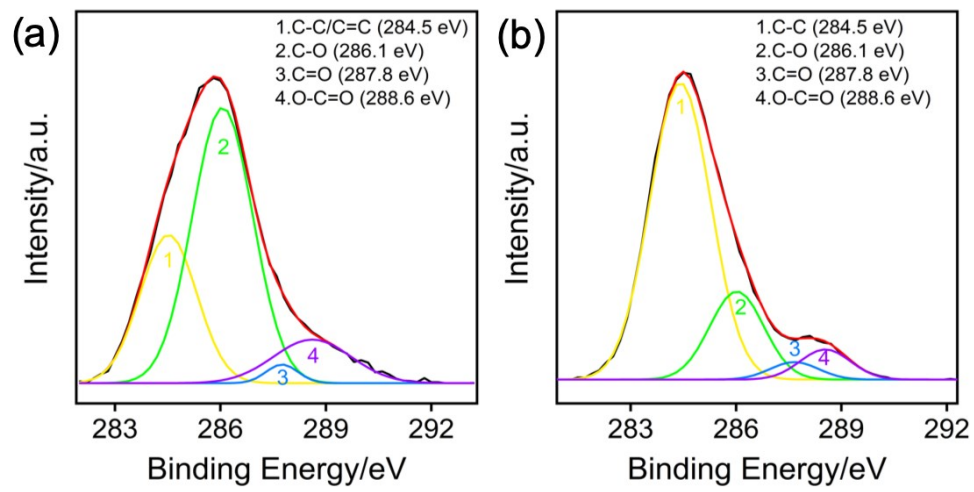

**Fig. S1** C 1s XPS profiles of GO/ITO and ErGO/ITO.

## S2 EIS characterization of VMSF/ErGO/ITO

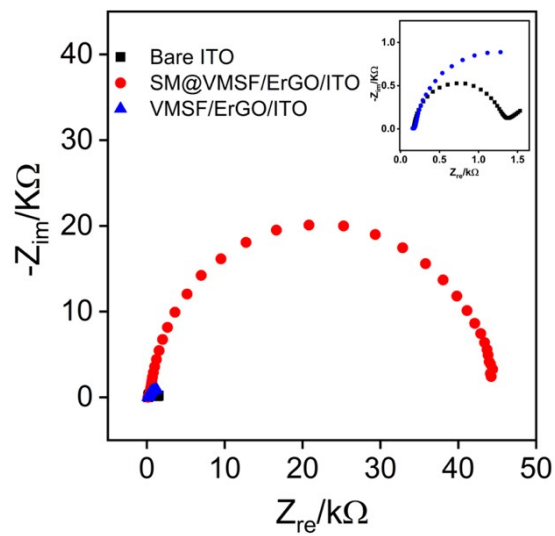

**Fig. S2** EIS plots of the Bare ITO, SM@VMSF/ErGO/ITO and VMSF/ErGO/ITO electrodes in 0.1 M KHP solution containing 2.5 mM  $\text{Fe}(\text{CN})_6^{3-/4-}$  at a frequency of 0.1 Hz to 100 kHz..

### S3. CVs of rutin at the VMSF/ITO and VMSF/ErGO/ITO

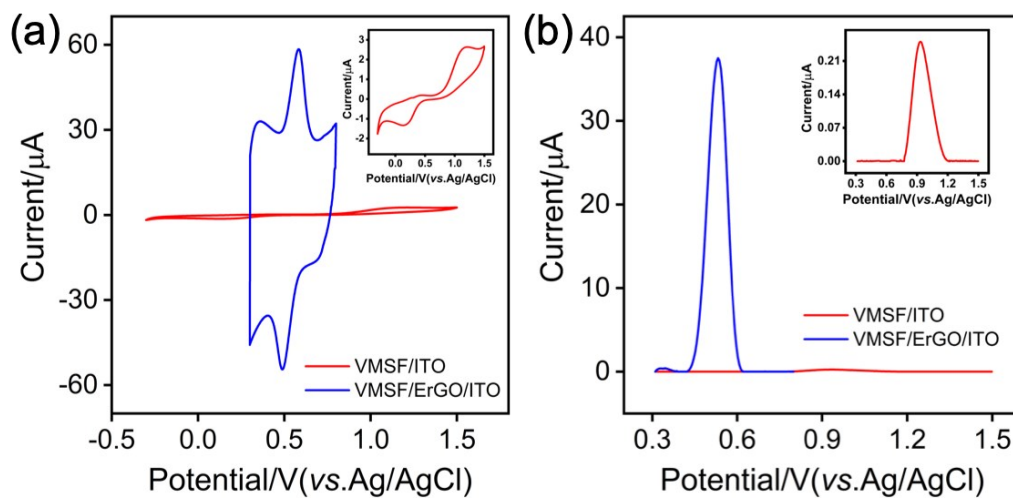

**Fig. S3** CVs (a) and DPVs (b) of 30  $\mu\text{M}$  rutin at the VMSF/ITO and VMSF/ErGO/ITO electrodes in 0.1 M PBS (pH = 3). The scan rate for CVs was 50 mV/s and the insets were the corresponding amplified view of the VMSF/ITO electrode.

#### S4. The effect of scan rate on the CV responses

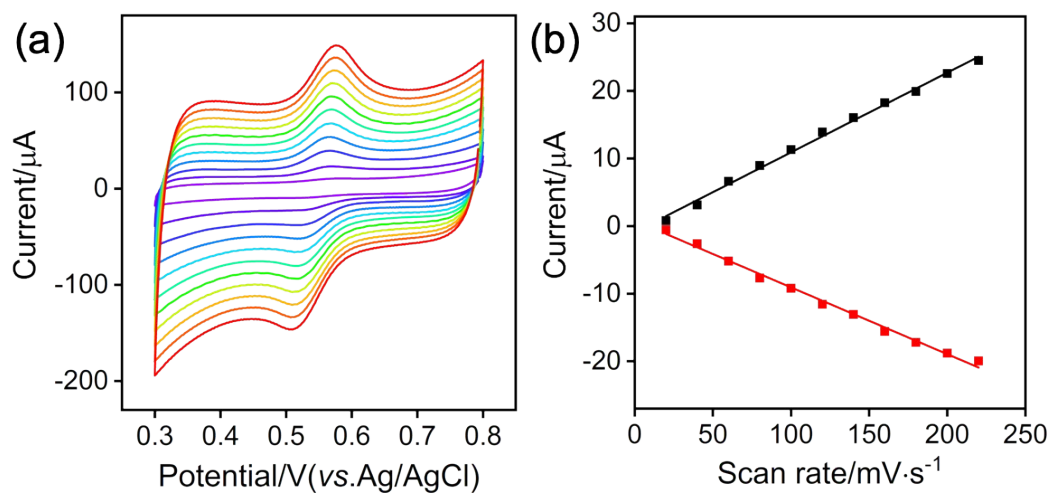

**Fig. S4** (a) CV curves obtained from VMSF/ErGO/ITO in PBS (0.1 M, pH 3.0) containing 30 μM rutin at various scan rates. (b) The dependence of anodic and cathodic peak potential on scan rate.

### S5. Transmittance spectra of bare ITO and VMSF/ErGO/ITO

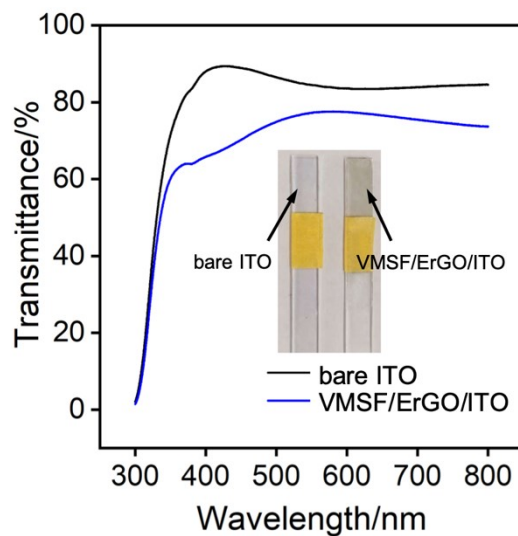

**Fig. S5** Transmittance spectra of the bare ITO and VMSF/ErGO/ITO. Inset was the photographs of the bare ITO and VMSF/ErGO/ITO electrode. The concentration of GO used here is 0.1 mg/mL.

## S6. Optimized conditions for electrochemical detection

### S6.1. The concentration of GO

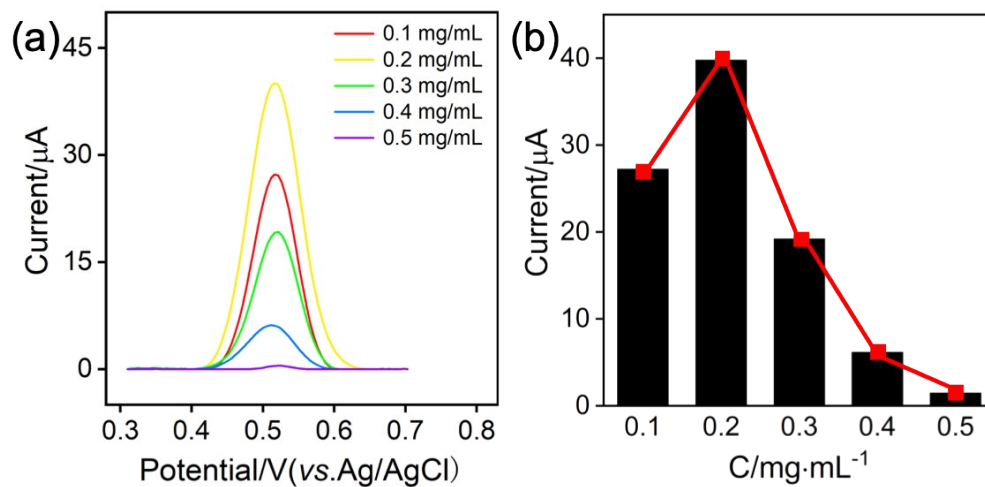

**Fig. S6** (a) DPVs of the VMSE/ErGO/ITO electrode prepared by various concentrations of GO in a 0.1 M PBS (pH=3) solution containing 30 μM rutin. (b) The dependence of anodic peak current on the GO concentration.

## S6.2 pH of supporting electrolyte

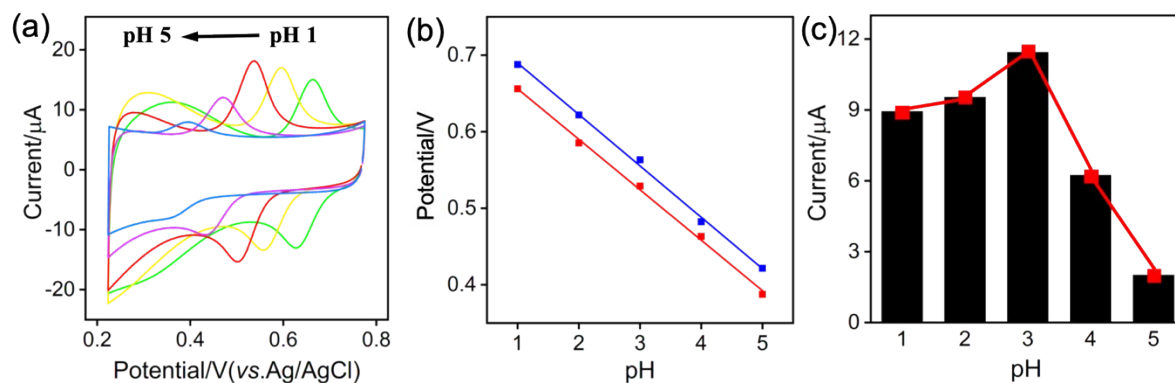

**Fig. S7** (a) CVs of the VMSF/ErGO/ITO electrode in a 0.1 M PBS solution containing 30 μM rutin at various pH values. (b) The dependence of cathodic peak potential ( $E_{pc}$ ) and anodic peak potential ( $E_{pa}$ ) on the pH value. (c) The dependence of anodic peak current on the pH value.



### S6.3 Preconcentration time

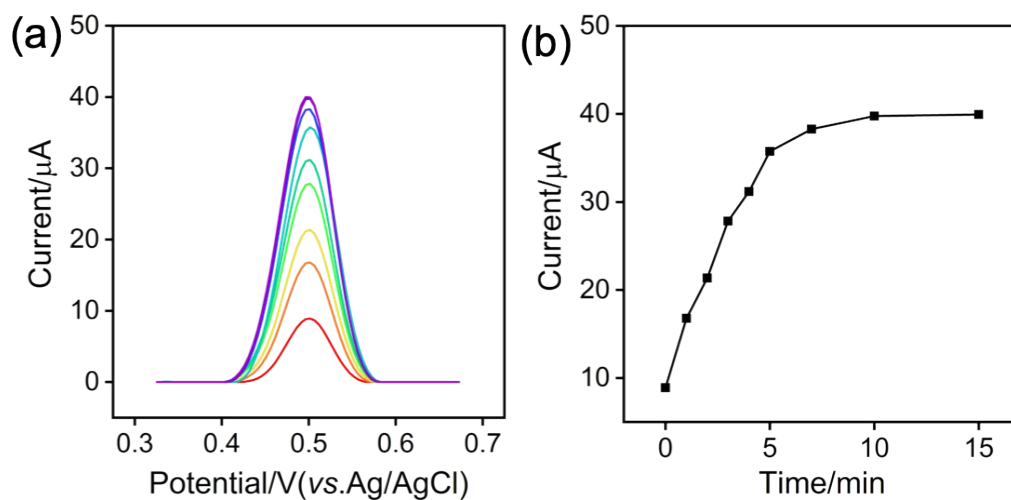

**Fig. S8** (a) DPVs of the VMSF/ErGO/ITO electrode in a 0.1 M PBS (pH=3) solution containing 30 μM rutin at different accumulation time. (b) The dependence of anodic peak current on the accumulation time.

### S7. Anti-interference study of the VMSF/ErGO/ITO

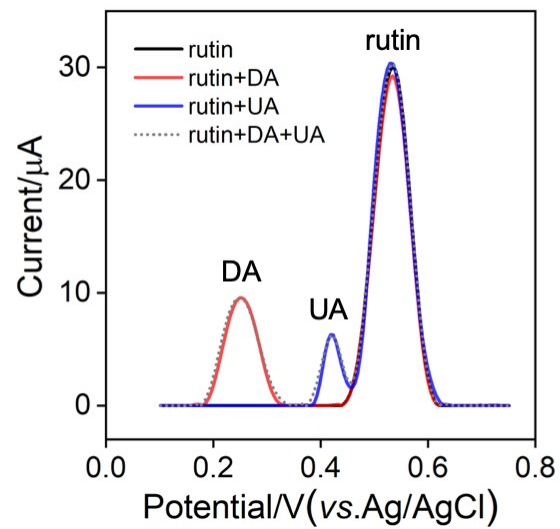

**Fig. S9** DPVs of the VMSF/ErGO/ITO electrode in a 0.1 M PBS (pH=3) solution containing 20 μM rutin in the absence and presence of 40 μM DA or/and UA.
